# Supplementary material for: Diversification of Colonization Factors in a Multidrug-Resistant Escherichia coli Lineage Evolving under Negative Frequency-Dependent Selection
Source: PubMed Central journal article supplement (PMC6479005; doi:10.1128/mbio.00644-19), 2019-04-23

All

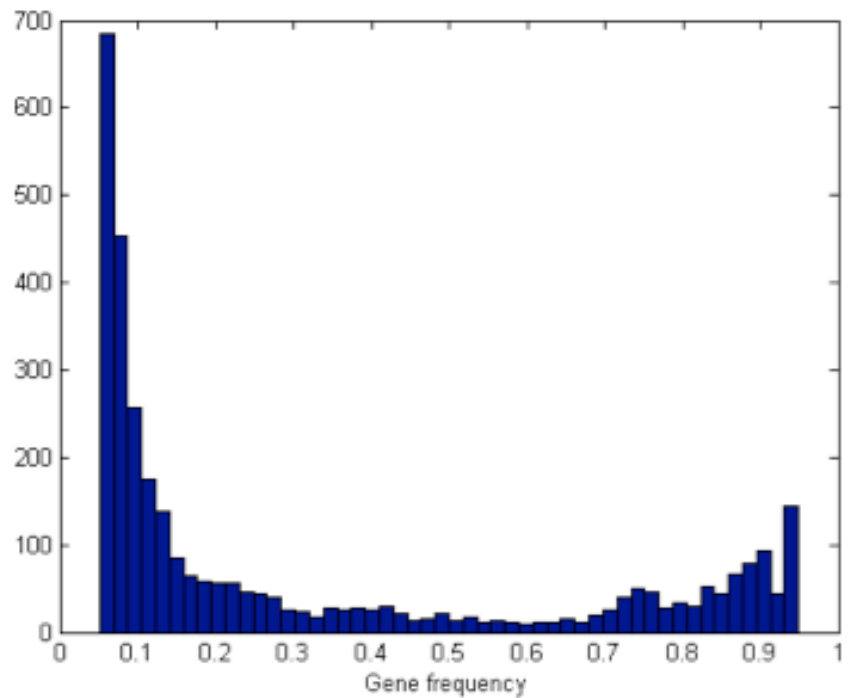

Clade A

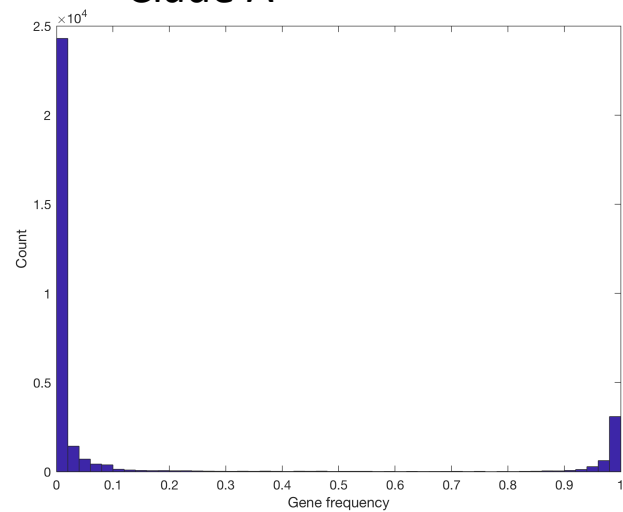

Clade B

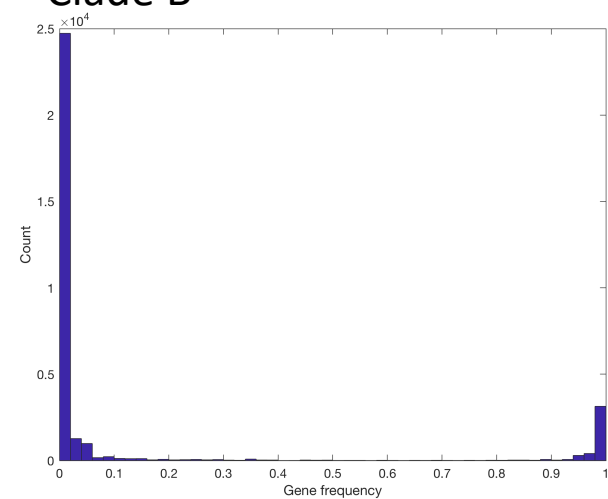

Clade C

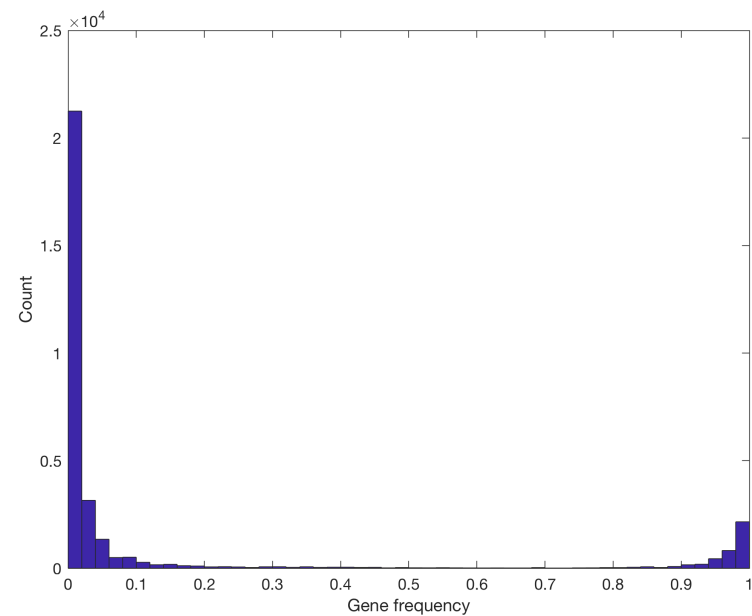

Supplement: mBio.00644-19-sf001.pdf [file mBio.00644-19-sf001.pdf]
