# Supplementary material for: Diversification of Colonization Factors in a Multidrug-Resistant Escherichia coli Lineage Evolving under Negative Frequency-Dependent Selection
Source: PubMed Central journal article supplement (PMC6479005; doi:10.1128/mbio.00644-19), 2019-04-23
Supplement: mBio.00644-19-st002.pdf [file mBio.00644-19-st002.pdf]

**Table S2a** Parameter estimates, and associated 95% credibility intervals in parentheses, derived from sequential Monte Carlo sampling of the BOLFI model fitted through 500 iterations of model simulation. The two fits represent a five parameter fit of heterogeneous NFDS, and a two parameter fit of a neutral model.

| Model fit | $\sigma_f$                    | $\sigma_w$                    | $p_f$                         | $r$                           | $m$                           |
|-----------|-------------------------------|-------------------------------|-------------------------------|-------------------------------|-------------------------------|
| NFDS      | 0.0128<br>(0.0027-<br>0.0276) | 0.0012<br>(0.0009-<br>0.0044) | 0.4893<br>(0.1025-<br>0.9773) | 0.1527<br>(0.0917-<br>0.2738) | 0.0026<br>(0.0009-<br>0.0234) |
| Neutral   | -                             | -                             | -                             | 0.0474<br>(0.0374-<br>0.0564) | 0.0013<br>(0.0009-<br>0.0046) |

**Table S2b** Tajima's D measurements for anaerobic metabolism showing 3 or more allelic variants within the ST131 population analysed

| Tajima's D Measurements Anaerobic Metabolic Genes |      |                                                  |            |                    |
|---------------------------------------------------|------|--------------------------------------------------|------------|--------------------|
|                                                   | Gene | Annotated Function                               | Tajima's D | Number of Variants |
| 1                                                 | nirB | Nitrite Reductase [NAD(P)H] large subunit        | -1.32e-08  | 3                  |
| 2                                                 | narY | Respiratory Nitrate Reductase 2 subunit beta     | 2.840      | 12                 |
| 3                                                 | eutB | Ethanolamine Ammonia-lyase heavy chain           | -0.547     | 4                  |
| 4                                                 | rffD | UDP-N-Acetyl-D-Mannosamine Dehydrogenase         | 1.84e-08   | 3                  |
| 5                                                 | rffE | UDP-N-Acetylglucosamine 2-Epimerase              | -6.81e-09  | 3                  |
| 6                                                 | nemA | Putative NADH:Flavin Oxidoreductase/NADH Oxidase | 3.622      | 20                 |
| 7                                                 | aroD | 3-Dehydroquinate Dehydratase                     | 2.350      | 7                  |
